# Supplementary material
Source: PubMed Central journal article supplement (PMC6447043)
Supplement: NIHMS1500319-supplement-10.pdf [file NIHMS1500319-supplement-10.pdf]

Table S3. Primers used in this study

| Primer name                      | Primer sequence                |
|----------------------------------|--------------------------------|
| RPS17F                           | 5'-CGCCATTATCCCCAGCAAG-3'      |
| RPS17R                           | 5'-TGTCGGGATCCACCTCAATG-3'     |
| IL-1bF                           | 5'-AAGGGCTGCTTCCAAACCTTTGAC-3' |
| IL-1bR                           | 5'-ATACTGCCTGCCTGAAGCTCTTGT-3' |
| IL-6F                            | 5'-CTCTGGAGCCCACCAAGAAC-3'     |
| IL-6R                            | 5'-TTGTGAAGTAGGGAAGGCCG-3'     |
| IL-18F                           | 5'-CACATGCGCCTTGTGATGAC-3'     |
| IL-18R                           | 5'-TGCAGCCTCGGGTATTCTG-3'      |
| IL-22F                           | 5'-TCAACCGCACCTTTATGCTG-3'     |
| IL-22R                           | 5'-TGAGTTTGGTCAGGAAAGGC-3'     |
| TNFalphaF                        | 5'-AGGGGATTATGGCTCAGGGT-3'     |
| TNFalphaR                        | 5'-GAGTCCTTGATGGTGGTGCA-3'     |
| Mip1alphaF                       | 5'-TGCCCTTGCTGTTCTTCTCTG-3'    |
| Mip1alphaR                       | 5'-CAACGATGAATTGGCGTGG-3'      |
| GM-CSFF                          | 5'-AGGCTAAGGTCCTGAGGAGG-3'     |
| GM-CSFR                          | 5'-GGGCTTCTTTGATGGCCTCT-3'     |
| Slc40a1 F                        | CGAGATGGATGGGTCTCCTA           |
| Slc40a1 R                        | AACAAGGCCACATTTTCGAC           |
| Hmox1 F                          | ACGCATATACCCGCTACCTG           |
| Hmox1 R                          | CCAGAGTGTTCAATTCGAGCA          |
| Transferrin F                    | ACCATGTTGTGGTCTCACGA           |
| Transferrin R                    | TTTGGTGTGCATCCCTGAACA          |
| Nramp1/slc11a1 F                 | AACATCTGTGCCAACAGCAG           |
| Nramp1/slc11a1 R                 | AAACCCTCCATCACGAACTG           |
| Hepcidin antimicrobial peptide F | TCTCCTGCTTCTCCTCCTTG           |
| Hepcidin antimicrobial peptide R | TGGGGAAGTTGGTGTCTCTC           |
| SLC39A4/ZIP4 F                   | CTGCACCTGATACCCAAGGT           |
| SLC39A4/ZIP4 R                   | GCCAGCTGCAGAGATATTCC           |
| HMOX2 F                          | CTGAAGAAGGTTGCCAGAG            |
| HMOX2 R                          | TATTGGCCTCCTCCACAATC           |
| SLC31A1 F                        | ACCACCTCAGCCTCACACTC           |
| SLC31A1 R                        | TCTCGGGCTATCTTGAGTCC           |
| RPS17F                           | 5'-CGCCATTATCCCCAGCAAG-3'      |
| RPS17R                           | 5'-TGTCGGGATCCACCTCAATG-3'     |
| 16s qPCR forward                 | 5'-GTGGTGCATGGTTGTCGTCA-3'     |
| 16s qPCR reverse                 | 5'-ACGTCGTCCCCACCTTCCTC-3'     |

|                |                            |
|----------------|----------------------------|
| espAFor1/2/3   | 5'-AGTGATCTTGCGGCTGAGTT-3' |
| espARev2       | 5'-ATCCACCGTCGTTGTCAAAT-3' |
| mapFor2        | 5'-AGCGGTTGAAAGCGTGATAC-3' |
| mapRev1/2      | 5'-CTTTACCGCACTGCTCATCA-3' |
| espIFor3       | 5'-AGATGAAGGCCTGCTCTCAG-3' |
| espIRev1/2/3   | 5'-ATATGCCTGGAACGGAAGT-3'  |
| TirFor1/3      | 5'-CTTCAGGAATGGGAGATGGA-3' |
| TirRev1/2      | 5'-CAACCGCCTGAACAATACCT-3' |
| GCP1 bepC      | TATCAAACCATTGGGGCCTA       |
| GCP2 bepC      | ATAACGATCGCGATTTCTGG       |
| GCP3 easR      | AAGAAAGACCCCTCGCAAAT       |
| GCP4 easR      | GAAATTTACCGTTCGTTTCG       |
| GCP5 fimD      | CCTCGGGCAATGAAAATAAA       |
| GCP6 fimD      | GTGCAGTAACGTGCTCTGGA       |
| stbD front for | GAGCAGCTACATGGACGTGA       |
| stbD front rev | TTTTCAGCACCCAGCTTACCC      |
| ler int for    | TGCTTCTTTAAGCCAACGTG       |
| ler int rev    | GGAAACTAATTCGCCACAA        |
| tir int for    | AGTTAGGATCCGGAGCGACT       |
| tir int rev    | GTTGTTGCGCAAATAGCAGA       |
| espG int for   | AAGCCGTGGAATGAGATGAC       |
| espG int rev   | CCCCGAGACGTATCCATAAA       |
