# Supplementary material
Source: PubMed Central journal article supplement (PMC6447043)

# Figure S5

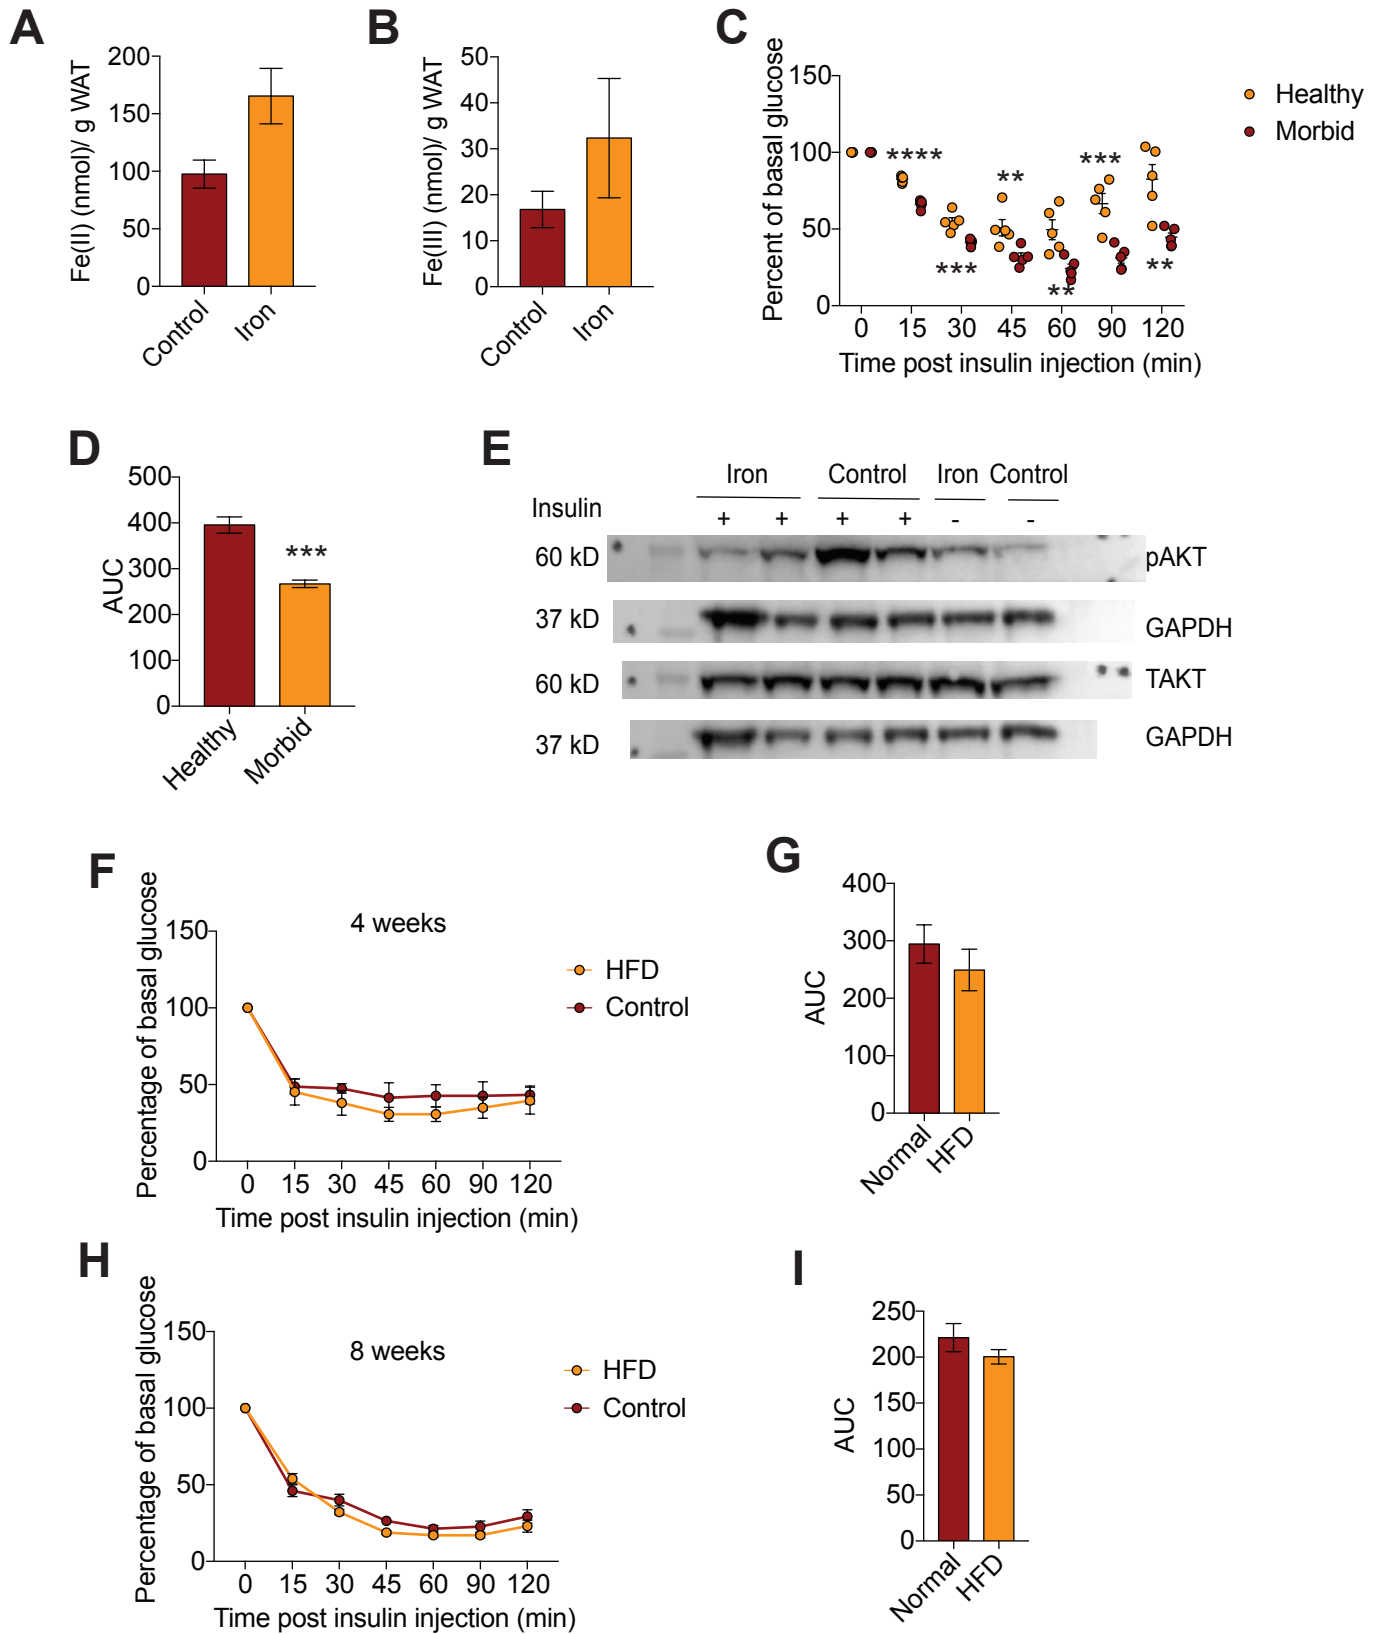

Supplement: NIHMS1500319-supplement-1.pdf [file NIHMS1500319-supplement-1.pdf]

**Figure S1**

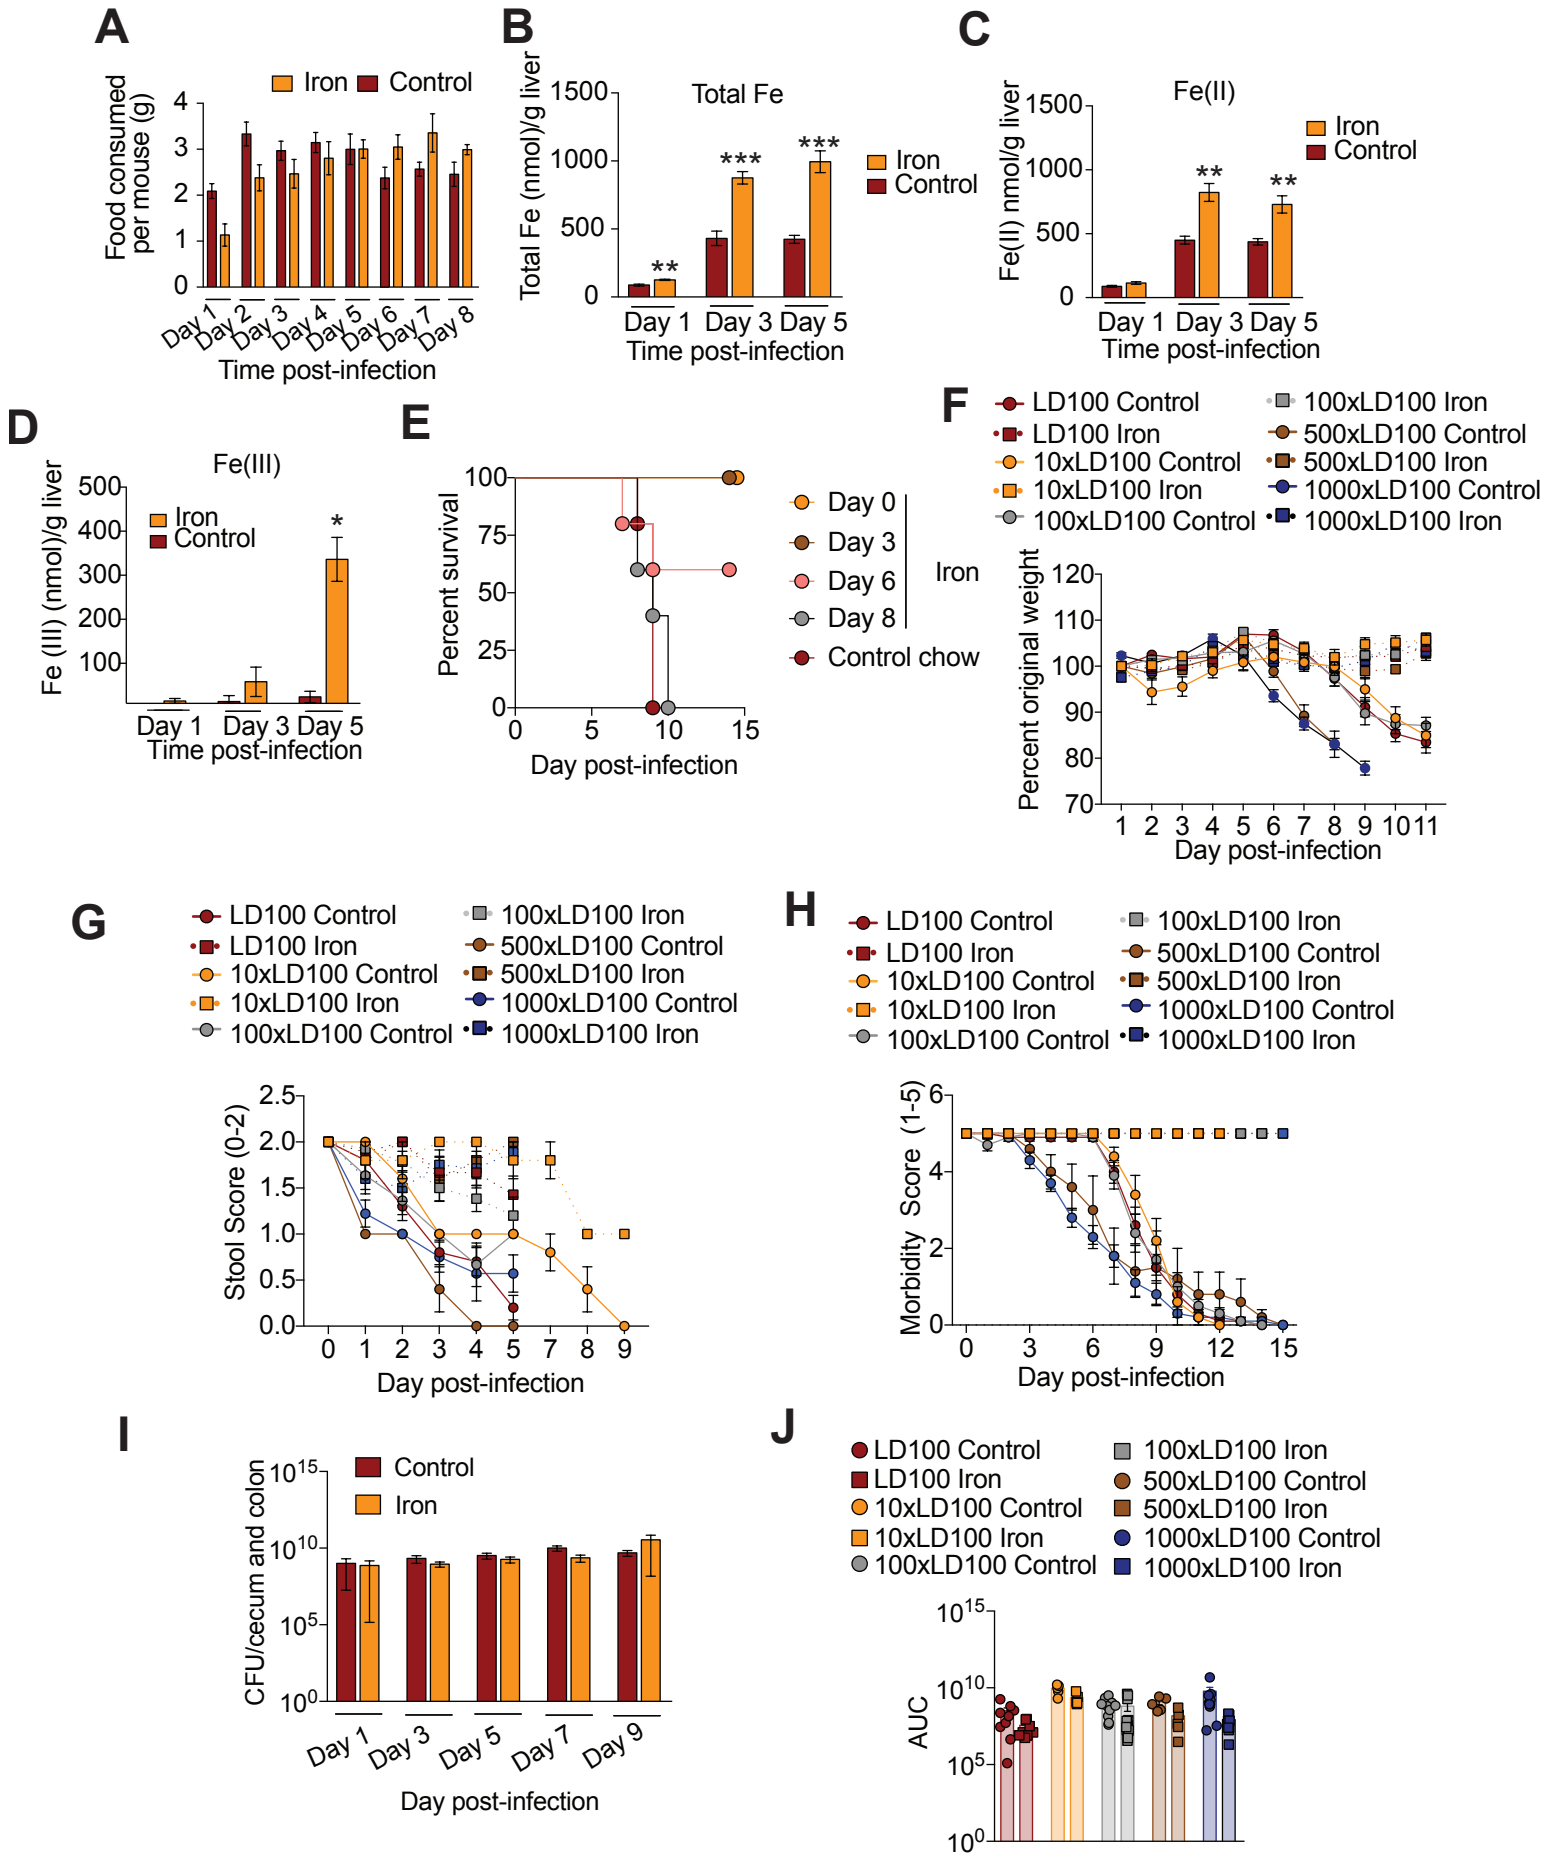

Supplement: NIHMS1500319-supplement-2.pdf [file NIHMS1500319-supplement-2.pdf]

# Figure S2

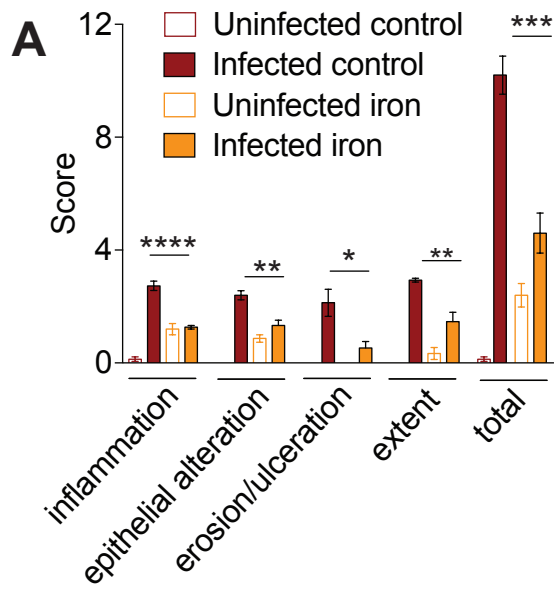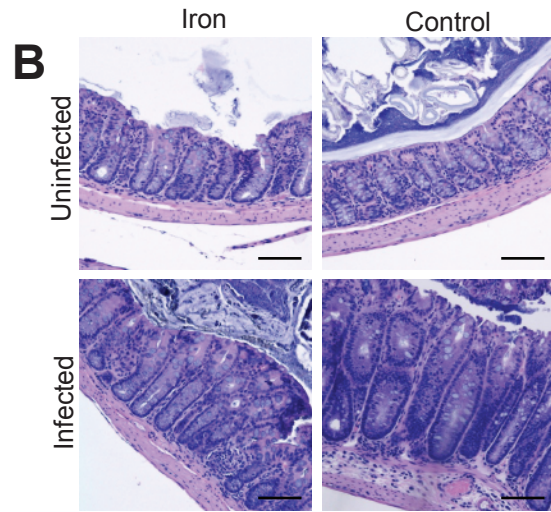

Supplement: NIHMS1500319-supplement-3.pdf [file NIHMS1500319-supplement-3.pdf]

**Figure S3**

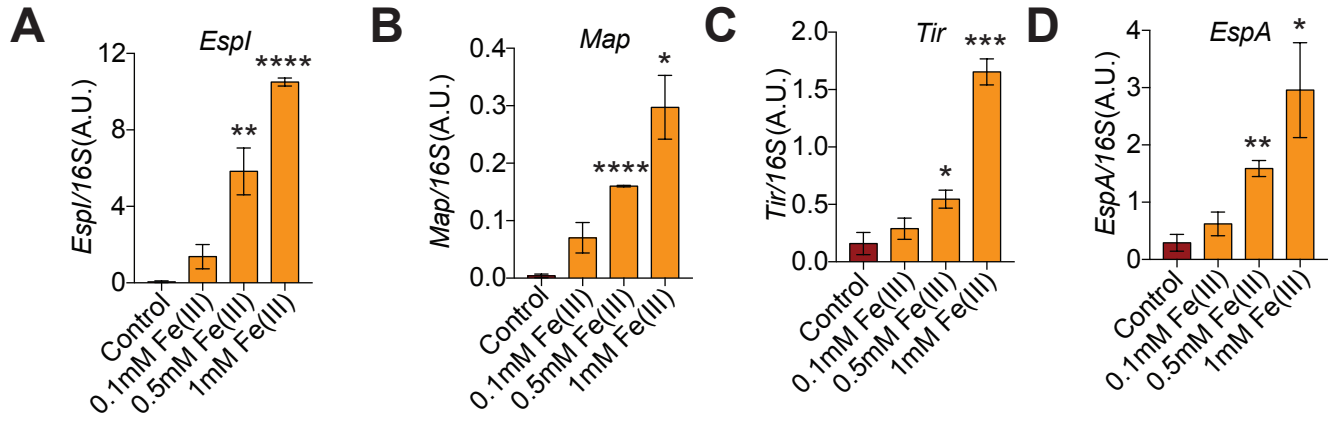

Supplement: NIHMS1500319-supplement-4.pdf [file NIHMS1500319-supplement-4.pdf]

**Figure S4**

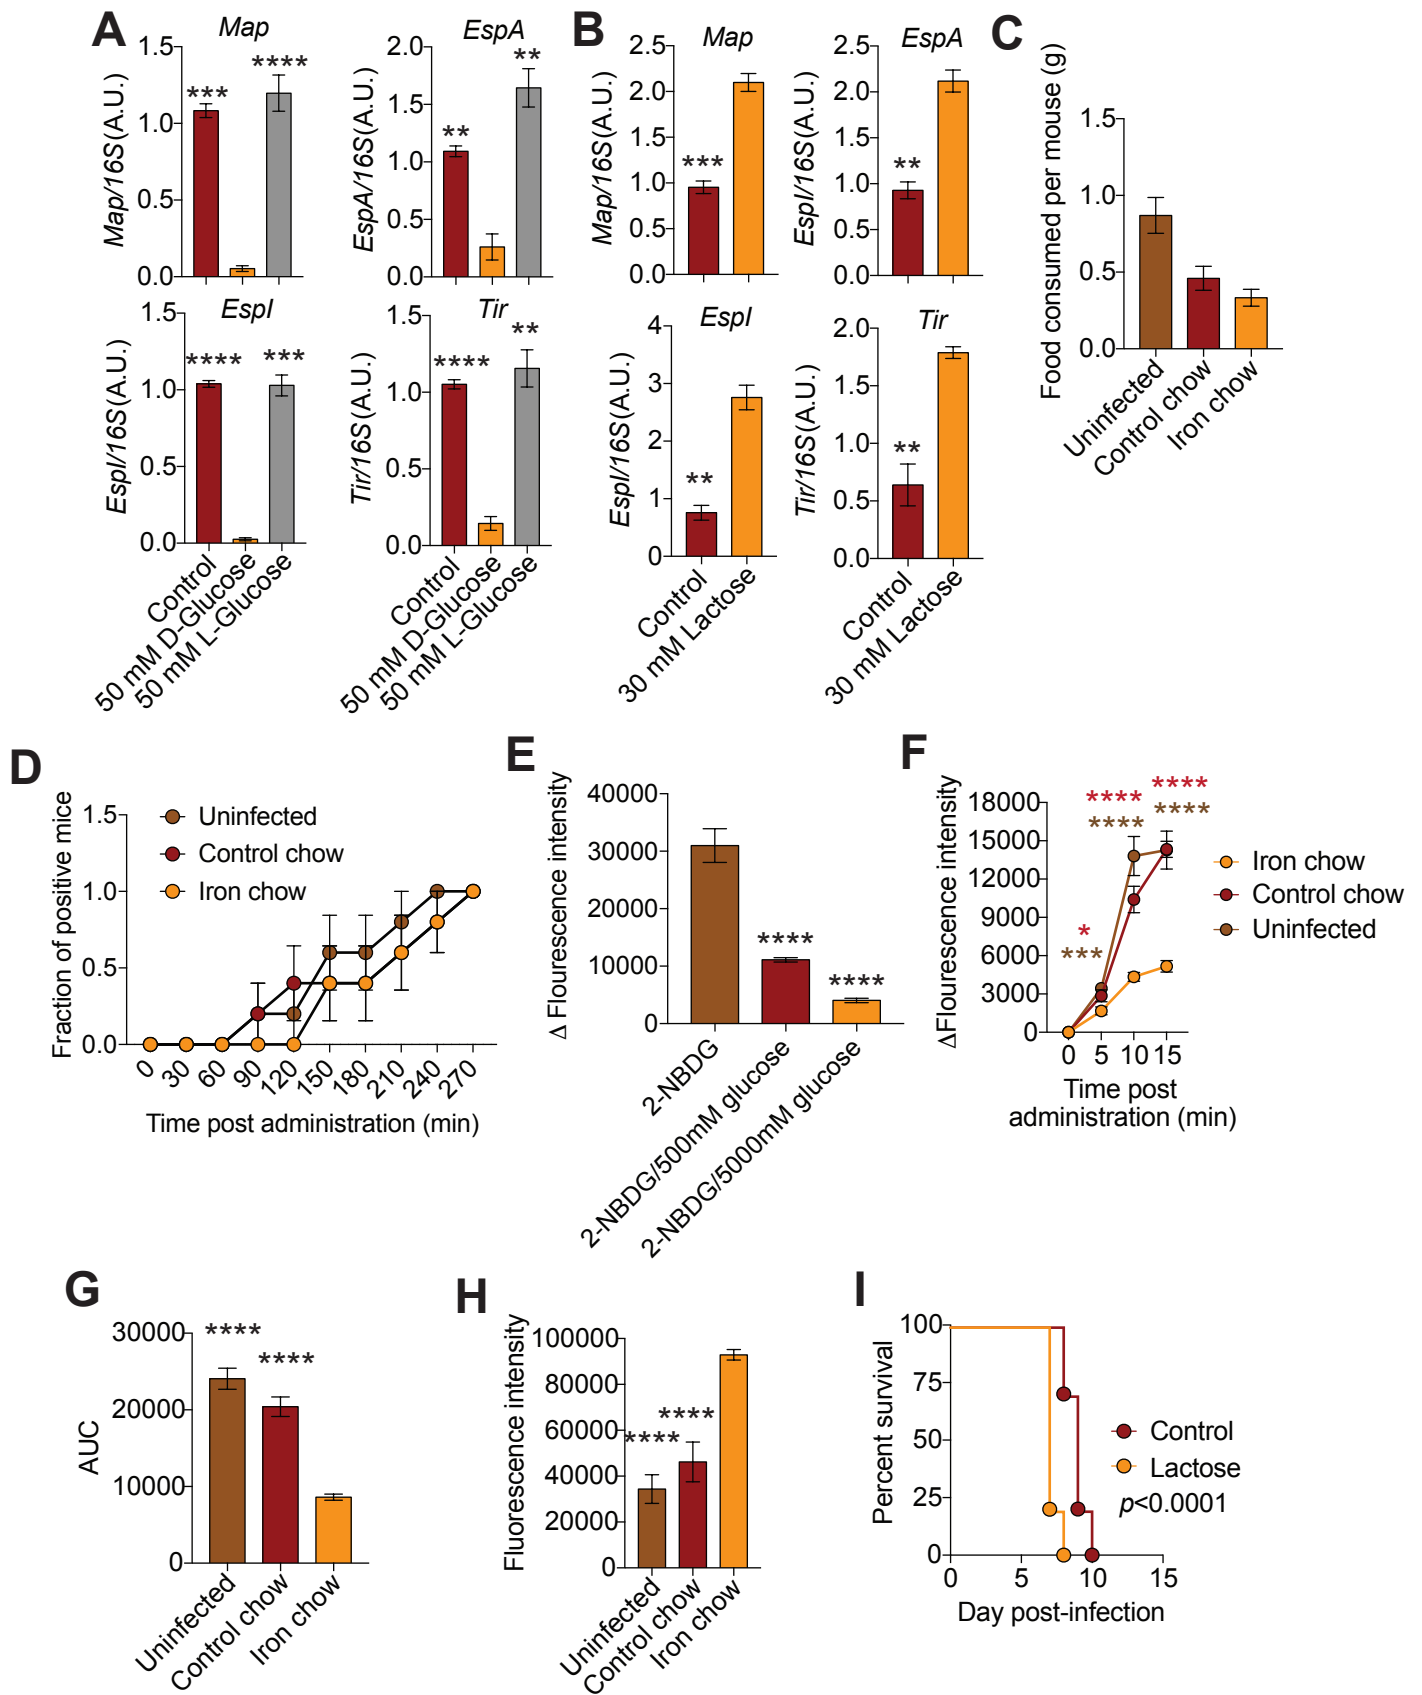

Supplement: NIHMS1500319-supplement-5.pdf [file NIHMS1500319-supplement-5.pdf]

# Figure S6

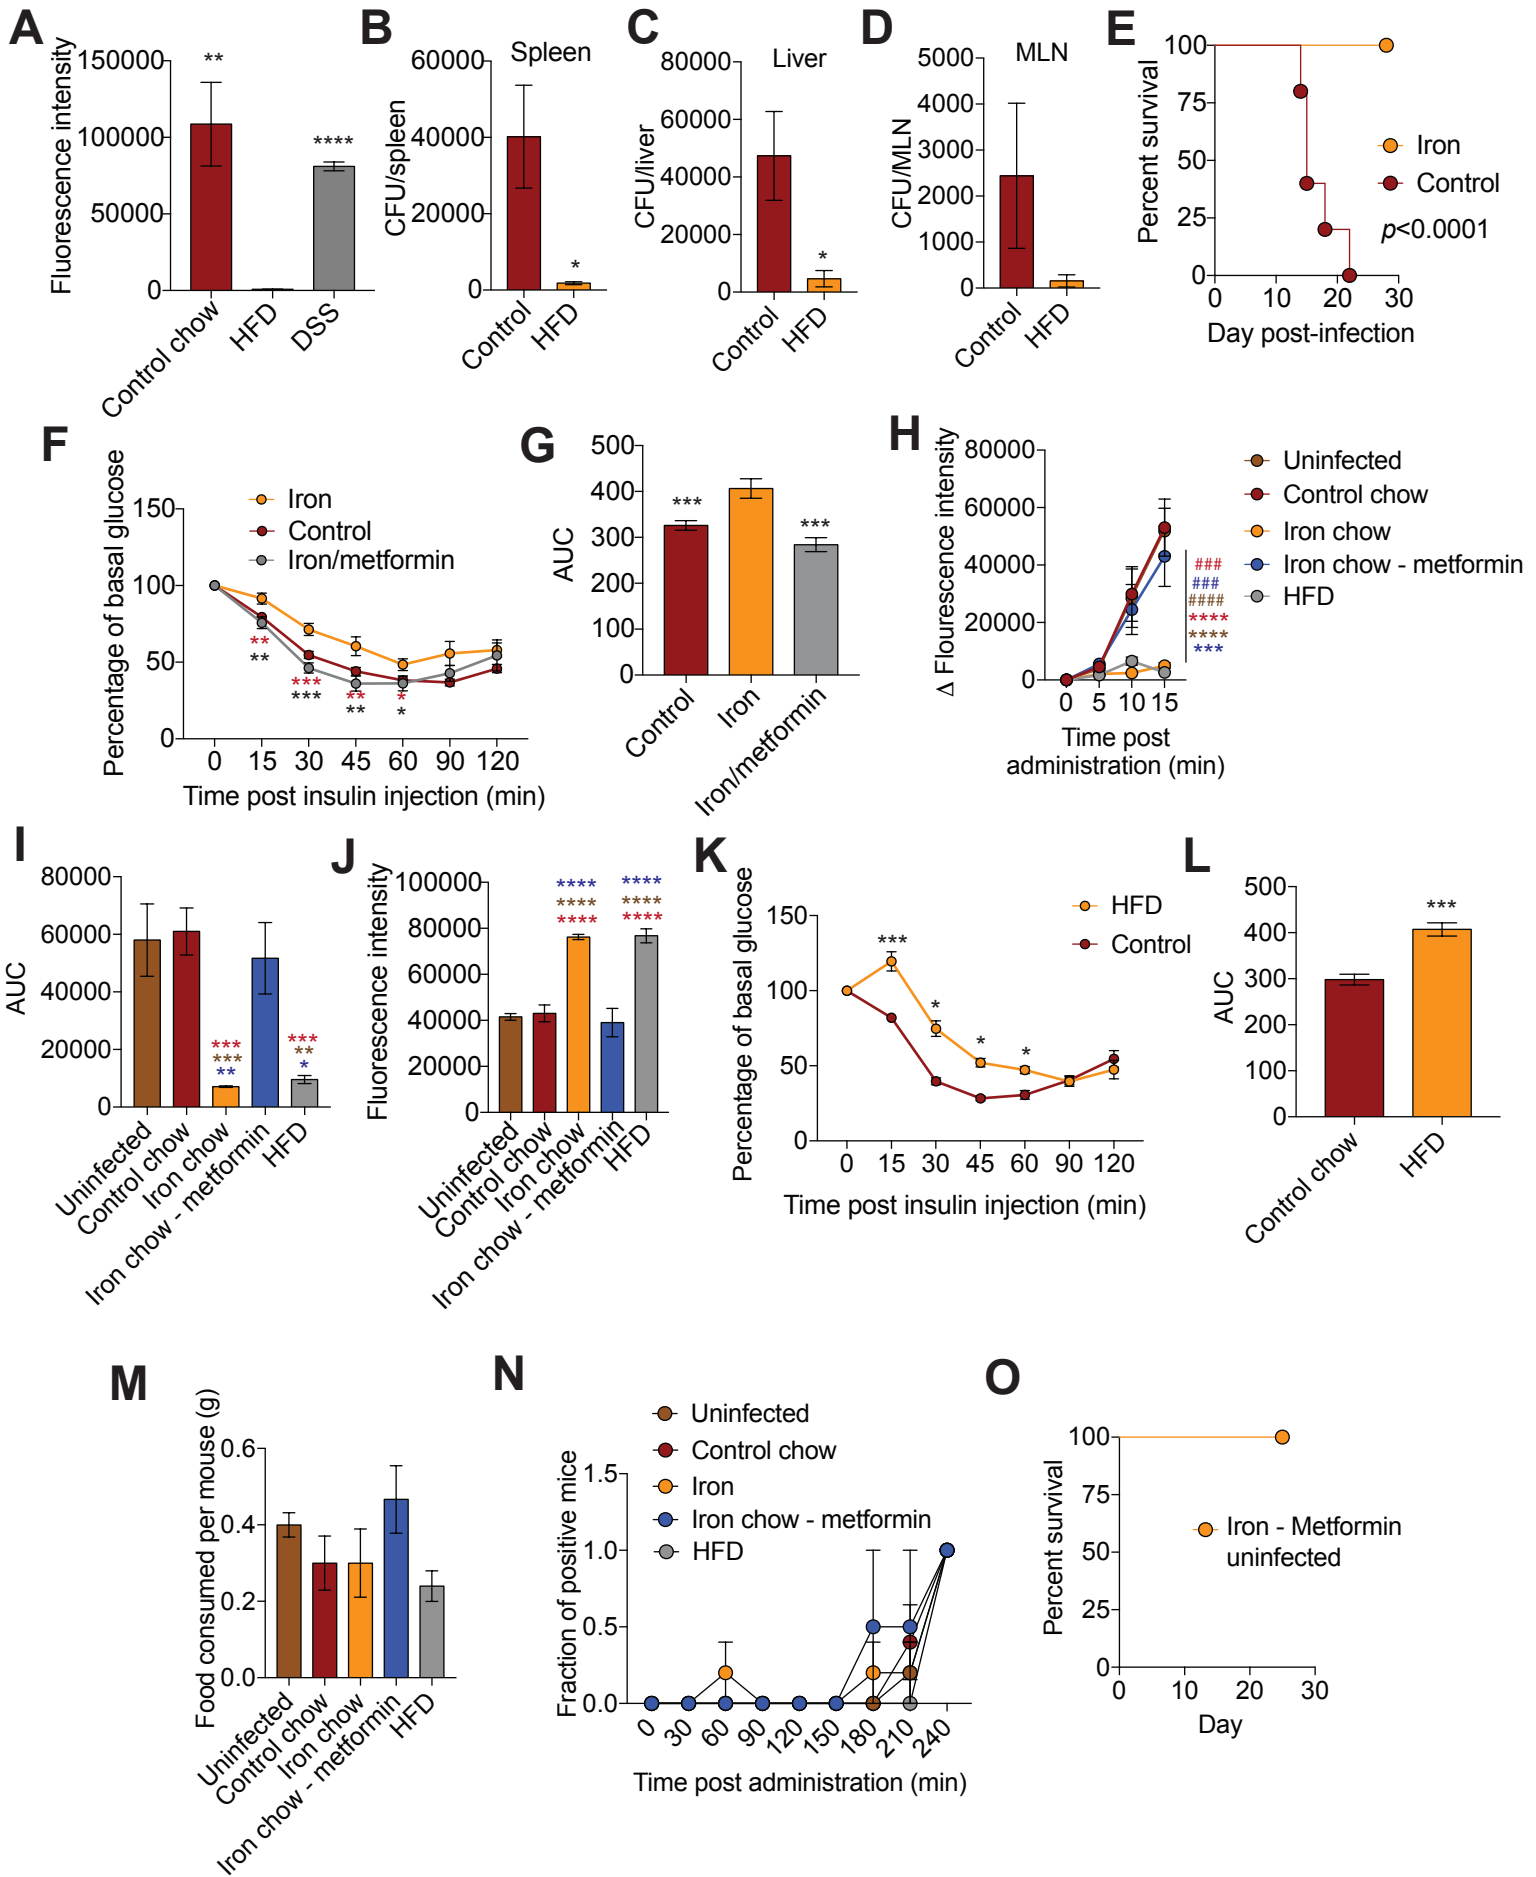

Supplement: NIHMS1500319-supplement-7.pdf [file NIHMS1500319-supplement-7.pdf]
